# Supplementary material for: Development and Validation of an Immune-Related Long Non-coding RNA Prognostic Model in Glioma
Source: PubMed Central journal article supplement (PMC8176429; doi:10.7150/jca.53831), 2021-05-19
Supplement: jcav12p4264s1.pdf [file jcav12p4264s1.pdf]

**Supplementary table 1** Immune related lncRNAs co-expression analysis

| Immune Gene | lncRNA     | cor         | pvalue    | Regulation |
|-------------|------------|-------------|-----------|------------|
| APOBEC3F    | CARD8-AS1  | 0.705144401 | 5.11E-106 | postive    |
| APOBEC3F    | LINC00900  | 0.718803729 | 5.46E-112 | postive    |
| APOBEC3G    | AC147651.3 | 0.720306208 | 1.15E-112 | postive    |
| APOBEC3G    | CARD8-AS1  | 0.741364336 | 1.14E-122 | postive    |
| APOBEC3G    | PSMB8-AS1  | 0.717875459 | 1.43E-111 | postive    |
| ARHGDIB     | AC098613.1 | 0.797669316 | 5.33E-155 | postive    |
| ARHGDIB     | AC138207.5 | 0.771675118 | 6.41E-139 | postive    |
| ARHGDIB     | AC145098.1 | 0.715605908 | 1.47E-110 | postive    |
| ARHGDIB     | CARD8-AS1  | 0.748075364 | 4.56E-126 | postive    |
| ARHGDIB     | LINC01150  | 0.846964223 | 3.87E-193 | postive    |
| ARHGDIB     | PCED1B-AS1 | 0.909974161 | 2.75E-268 | postive    |
| BLNK        | AC090559.1 | 0.741358613 | 1.14E-122 | postive    |
| BLNK        | AC098613.1 | 0.734313337 | 3.24E-119 | postive    |
| BLNK        | LINC01150  | 0.705879595 | 2.49E-106 | postive    |
| C2          | AC145098.1 | 0.70621531  | 1.79E-106 | postive    |
| CCR1        | AC008760.2 | 0.7187544   | 5.75E-112 | postive    |
| CCR1        | AC090559.1 | 0.71537425  | 1.86E-110 | postive    |
| CCR1        | AC098613.1 | 0.72230464  | 1.41E-113 | postive    |
| CCR1        | AC110995.1 | 0.784028223 | 2.78E-146 | postive    |
| CCR1        | AC145098.1 | 0.759724874 | 3.17E-132 | postive    |
| CCR1        | LINC01150  | 0.744413609 | 3.35E-124 | postive    |
| CCR1        | PCED1B-AS1 | 0.722379622 | 1.30E-113 | postive    |
| CCR5        | AC008760.2 | 0.70157668  | 1.63E-104 | postive    |
| CCR5        | AC098613.1 | 0.717158712 | 2.99E-111 | postive    |
| CCR5        | AC145098.1 | 0.806793733 | 3.26E-161 | postive    |
| CCR5        | LINC01150  | 0.720930531 | 5.96E-113 | postive    |
| CD164       | CARD8-AS1  | 0.710153573 | 3.62E-108 | postive    |
| CD22        | AC009063.2 | 0.721487325 | 3.33E-113 | postive    |
| CD22        | AC016597.1 | 0.888680328 | 6.95E-238 | postive    |
| CD22        | AC018647.1 | 0.773593535 | 4.94E-140 | postive    |
| CD22        | AL023284.4 | 0.770844845 | 1.93E-138 | postive    |
| CD22        | HPN-AS1    | 0.741357995 | 1.14E-122 | postive    |
| CD22        | NTM-AS1    | 0.791749961 | 3.89E-151 | postive    |
| CD24        | AL355297.4 | 0.706904958 | 9.08E-107 | postive    |
| CD24        | LINC02526  | 0.838631108 | 8.36E-186 | postive    |
| CD4         | AC002091.1 | 0.757729501 | 3.81E-131 | postive    |
| CD4         | AC090559.1 | 0.787525554 | 1.86E-148 | postive    |
| CD4         | AC110995.1 | 0.760675551 | 9.61E-133 | postive    |
| CD4         | AC138207.5 | 0.743875963 | 6.26E-124 | postive    |
| CD4         | AC145098.1 | 0.777577478 | 2.23E-142 | postive    |
| CD4         | AL133371.2 | 0.715787423 | 1.22E-110 | postive    |
| CD4         | AL161785.1 | 0.753969387 | 3.86E-129 | postive    |

---

|        |             |             |           |         |
|--------|-------------|-------------|-----------|---------|
| CD4    | LINC01150   | 0.790258034 | 3.50E-150 | postive |
| CD4    | PCED1B-AS1  | 0.779915323 | 8.88E-144 | postive |
| CD74   | AC138207.5  | 0.709102562 | 1.03E-107 | postive |
| CD74   | AC145098.1  | 0.725492078 | 4.81E-115 | postive |
| CD74   | LINC01150   | 0.745477327 | 9.69E-125 | postive |
| CD74   | PCED1B-AS1  | 0.760234647 | 1.67E-132 | postive |
| CD86   | AC002091.1  | 0.745398653 | 1.06E-124 | postive |
| CD86   | AC090559.1  | 0.759425908 | 4.61E-132 | postive |
| CD86   | AC098613.1  | 0.779000474 | 3.15E-143 | postive |
| CD86   | AC110995.1  | 0.711663439 | 7.99E-109 | postive |
| CD86   | AC145098.1  | 0.715157148 | 2.32E-110 | postive |
| CD86   | AL133371.2  | 0.71978006  | 1.98E-112 | postive |
| CD86   | AL161785.1  | 0.745794944 | 6.69E-125 | postive |
| CD86   | LINC01150   | 0.81087443  | 4.22E-164 | postive |
| CD86   | PCED1B-AS1  | 0.808496507 | 2.07E-162 | postive |
| CDC42  | CARD8-AS1   | 0.74710146  | 1.44E-125 | postive |
| CDC42  | LINC00339   | 0.75886268  | 9.30E-132 | postive |
| CKLF   | CARD8-AS1   | 0.768628529 | 3.56E-137 | postive |
| CKLF   | CYTOR       | 0.713624251 | 1.10E-109 | postive |
| CKLF   | LINC00339   | 0.718759636 | 5.72E-112 | postive |
| CKLF   | MIR4435-2HG | 0.70067002  | 3.89E-104 | postive |
| CLEC7A | AC098613.1  | 0.715407636 | 1.80E-110 | postive |
| CLEC7A | AC138207.4  | 0.71669061  | 4.83E-111 | postive |
| CLEC7A | AC145098.1  | 0.756581395 | 1.57E-130 | postive |
| CLEC7A | LINC01150   | 0.74185993  | 6.43E-123 | postive |
| CLEC7A | PCED1B-AS1  | 0.749152299 | 1.27E-126 | postive |
| CRHR1  | AF106564.1  | 0.787283441 | 2.64E-148 | postive |
| CTSC   | PCED1B-AS1  | 0.723040429 | 6.49E-114 | postive |
| CTSS   | AC002091.1  | 0.736168221 | 4.10E-120 | postive |
| CTSS   | AC098613.1  | 0.755208855 | 8.50E-130 | postive |
| CTSS   | AC138207.4  | 0.700489724 | 4.63E-104 | postive |
| CTSS   | AC138207.5  | 0.748916897 | 1.68E-126 | postive |
| CTSS   | AC145098.1  | 0.756611954 | 1.52E-130 | postive |
| CTSS   | CARD8-AS1   | 0.713325121 | 1.49E-109 | postive |
| CTSS   | LINC01150   | 0.792055415 | 2.47E-151 | postive |
| CTSS   | PCED1B-AS1  | 0.800706648 | 4.95E-157 | postive |
| DOCK2  | AC002091.1  | 0.767326197 | 1.95E-136 | postive |
| DOCK2  | AC090559.1  | 0.901453138 | 2.72E-255 | postive |
| DOCK2  | AC093627.7  | 0.737711068 | 7.24E-121 | postive |
| DOCK2  | AC110995.1  | 0.727653497 | 4.73E-116 | postive |
| DOCK2  | AF127936.1  | 0.712175089 | 4.77E-109 | postive |
| DOCK2  | AL133371.2  | 0.727312226 | 6.84E-116 | postive |
| DOCK2  | AL161785.1  | 0.793248125 | 4.21E-152 | postive |
| DOCK2  | LINC01150   | 0.726192951 | 2.27E-115 | postive |

---

---

|        |            |             |           |         |
|--------|------------|-------------|-----------|---------|
| EBI3   | AC090559.1 | 0.710280161 | 3.19E-108 | postive |
| EBI3   | AL161785.1 | 0.749975955 | 4.76E-127 | postive |
| FCGR1A | AC098613.1 | 0.814178566 | 1.72E-166 | postive |
| FCGR1A | AC138207.5 | 0.770142591 | 4.87E-138 | postive |
| FCGR1A | AL355922.1 | 0.731671179 | 6.00E-118 | postive |
| FCGR1A | LINC01150  | 0.86369323  | 2.79E-209 | postive |
| FCGR1A | PCED1B-AS1 | 0.90456717  | 6.73E-260 | postive |
| FCGR3A | AC008760.2 | 0.740036628 | 5.18E-122 | postive |
| FCGR3A | AC098613.1 | 0.724727027 | 1.09E-114 | postive |
| FCGR3A | AC138207.5 | 0.713585243 | 1.15E-109 | postive |
| FCGR3A | AC145098.1 | 0.787986879 | 9.56E-149 | postive |
| FCGR3A | AL355922.1 | 0.70568423  | 3.01E-106 | postive |
| FCGR3A | LINC01150  | 0.783357333 | 7.18E-146 | postive |
| FCGR3A | PCED1B-AS1 | 0.849409663 | 2.25E-195 | postive |
| FCGRT  | AC138207.5 | 0.730671243 | 1.79E-117 | postive |
| FCGRT  | CARD8-AS1  | 0.735259795 | 1.13E-119 | postive |
| FCGRT  | PCED1B-AS1 | 0.781927662 | 5.37E-145 | postive |
| FYB1   | AC008760.2 | 0.700409957 | 5.00E-104 | postive |
| FYB1   | AC090559.1 | 0.811068532 | 3.06E-164 | postive |
| GPR65  | AC008760.2 | 0.708239689 | 2.43E-107 | postive |
| GPR65  | AC098613.1 | 0.816129043 | 6.34E-168 | postive |
| GPR65  | AC138207.5 | 0.734795372 | 1.90E-119 | postive |
| GPR65  | AC145098.1 | 0.785418152 | 3.84E-147 | postive |
| GPR65  | CARD8-AS1  | 0.782969566 | 1.24E-145 | postive |
| GPR65  | LINC01150  | 0.823067846 | 3.64E-173 | postive |
| GPR65  | PCED1B-AS1 | 0.846696156 | 6.77E-193 | postive |
| HAMP   | AC008760.2 | 0.720906123 | 6.12E-113 | postive |
| HAMP   | AC098613.1 | 0.734837789 | 1.81E-119 | postive |
| HAMP   | AL355922.1 | 0.796337035 | 4.05E-154 | postive |
| HAMP   | LINC01150  | 0.729039368 | 1.06E-116 | postive |
| HAMP   | PCED1B-AS1 | 0.803559672 | 5.66E-159 | postive |
| HCLS1  | AC002091.1 | 0.733956578 | 4.82E-119 | postive |
| HCLS1  | AC090559.1 | 0.733472884 | 8.24E-119 | postive |
| HCLS1  | AC145098.1 | 0.738133394 | 4.49E-121 | postive |
| HCLS1  | AL133371.2 | 0.734470068 | 2.73E-119 | postive |
| HCLS1  | AL161785.1 | 0.7445107   | 2.99E-124 | postive |
| HCLS1  | LINC01150  | 0.71868419  | 6.18E-112 | postive |
| HCLS1  | PCED1B-AS1 | 0.736705561 | 2.24E-120 | postive |
| HDAC4  | AC009227.1 | 0.73071245  | 1.71E-117 | postive |
| HDAC4  | PAXBP1-AS1 | 0.717072138 | 3.27E-111 | postive |
| HDAC4  | SLC6A1-AS1 | 0.707659082 | 4.32E-107 | postive |
| HELLS  | AC012073.1 | 0.711928335 | 6.12E-109 | postive |
| HELLS  | TMPO-AS1   | 0.711711435 | 7.61E-109 | postive |
| IGSF6  | AC098613.1 | 0.726627353 | 1.43E-115 | postive |

---

---

|        |            |             |           |         |
|--------|------------|-------------|-----------|---------|
| IGSF6  | AC138207.5 | 0.722925305 | 7.33E-114 | postive |
| IGSF6  | AL161785.1 | 0.713978704 | 7.70E-110 | postive |
| IGSF6  | LINC01150  | 0.752924084 | 1.37E-128 | postive |
| IGSF6  | PCED1B-AS1 | 0.715927523 | 1.06E-110 | postive |
| IL10RB | AC073611.1 | 0.724035253 | 2.27E-114 | postive |
| IL10RB | AL445524.1 | 0.724753357 | 1.06E-114 | postive |
| IL10RB | CARD8-AS1  | 0.717561845 | 1.97E-111 | postive |
| IL16   | AC002091.1 | 0.733017712 | 1.36E-118 | postive |
| IL16   | AC090559.1 | 0.811987428 | 6.69E-165 | postive |
| IL16   | AC098613.1 | 0.727871767 | 3.74E-116 | postive |
| IL16   | AC145098.1 | 0.702228822 | 8.69E-105 | postive |
| IL16   | AL133371.2 | 0.708796391 | 1.40E-107 | postive |
| IL16   | AL161785.1 | 0.786519228 | 7.94E-148 | postive |
| IL16   | LINC01150  | 0.774291661 | 1.93E-140 | postive |
| IL16   | PCED1B-AS1 | 0.759345436 | 5.09E-132 | postive |
| IL18   | AC098613.1 | 0.759927404 | 2.46E-132 | postive |
| IL18   | AC138207.5 | 0.71291931  | 2.25E-109 | postive |
| IL18   | AL161785.1 | 0.755227444 | 8.31E-130 | postive |
| IL18   | LINC01150  | 0.7842163   | 2.13E-146 | postive |
| IL18   | PCED1B-AS1 | 0.801115095 | 2.62E-157 | postive |
| IL4R   | AC145098.1 | 0.737783127 | 6.67E-121 | postive |
| IL6R   | AC090559.1 | 0.733344085 | 9.50E-119 | postive |
| IRF8   | AC090559.1 | 0.749338461 | 1.02E-126 | postive |
| IRF8   | AC110995.1 | 0.715196133 | 2.23E-110 | postive |
| IRF8   | AF127936.1 | 0.703077519 | 3.82E-105 | postive |
| IRF8   | AL161785.1 | 0.768525145 | 4.08E-137 | postive |
| IRF8   | LINC01150  | 0.703702909 | 2.08E-105 | postive |
| ITGB2  | AC002091.1 | 0.756175058 | 2.60E-130 | postive |
| ITGB2  | AC008760.2 | 0.737180459 | 1.32E-120 | postive |
| ITGB2  | AC090559.1 | 0.768091176 | 7.19E-137 | postive |
| ITGB2  | AC098613.1 | 0.723082391 | 6.21E-114 | postive |
| ITGB2  | AC138207.5 | 0.764942849 | 4.24E-135 | postive |
| ITGB2  | AC145098.1 | 0.813063514 | 1.12E-165 | postive |
| ITGB2  | AL133371.2 | 0.722935153 | 7.26E-114 | postive |
| ITGB2  | AL161785.1 | 0.785882456 | 1.98E-147 | postive |
| ITGB2  | LINC01150  | 0.807435703 | 1.16E-161 | postive |
| ITGB2  | PCED1B-AS1 | 0.80263106  | 2.44E-158 | postive |
| KAT6A  | AC010834.3 | 0.729039217 | 1.06E-116 | postive |
| KAT6A  | AC068152.1 | 0.735078684 | 1.38E-119 | postive |
| KAT6A  | AC108449.2 | 0.817672177 | 4.53E-169 | postive |
| KMT2A  | AC009227.1 | 0.707164715 | 7.03E-107 | postive |
| KMT2A  | AC010834.3 | 0.762832937 | 6.28E-134 | postive |
| KMT2A  | AC108449.2 | 0.770687967 | 2.37E-138 | postive |
| KMT2A  | AL157392.3 | 0.730086527 | 3.39E-117 | postive |

---

---

|        |            |             |           |         |
|--------|------------|-------------|-----------|---------|
| KMT2A  | ZBTB20-AS4 | 0.749050566 | 1.43E-126 | postive |
| LAT2   | AC090559.1 | 0.707308662 | 6.10E-107 | postive |
| LAT2   | AC098613.1 | 0.800833287 | 4.06E-157 | postive |
| LAT2   | AC138207.5 | 0.713077868 | 1.92E-109 | postive |
| LAT2   | AL161785.1 | 0.742904012 | 1.93E-123 | postive |
| LAT2   | LINC01150  | 0.831666241 | 5.47E-180 | postive |
| LAT2   | PCED1B-AS1 | 0.829790515 | 1.82E-178 | postive |
| LCP2   | AC145098.1 | 0.785496168 | 3.44E-147 | postive |
| LCP2   | LINC01150  | 0.712313772 | 4.15E-109 | postive |
| LCP2   | PCED1B-AS1 | 0.729772257 | 4.77E-117 | postive |
| LIG1   | AC012073.1 | 0.725007424 | 8.06E-115 | postive |
| LIG1   | ZIM2-AS1   | 0.700152363 | 6.39E-104 | postive |
| LILRB2 | AC138207.4 | 0.731824182 | 5.07E-118 | postive |
| LILRB2 | AC138207.5 | 0.710092546 | 3.85E-108 | postive |
| LILRB2 | AC145098.1 | 0.746707764 | 2.29E-125 | postive |
| LILRB2 | PCED1B-AS1 | 0.729882301 | 4.24E-117 | postive |
| LRMP   | AC090559.1 | 0.71578741  | 1.22E-110 | postive |
| LST1   | AC098613.1 | 0.795768965 | 9.57E-154 | postive |
| LST1   | AC138207.5 | 0.737791875 | 6.61E-121 | postive |
| LST1   | LINC01150  | 0.781848886 | 5.99E-145 | postive |
| LST1   | PCED1B-AS1 | 0.873431015 | 1.06E-219 | postive |
| LY86   | AC018755.4 | 0.700675424 | 3.87E-104 | postive |
| LY86   | AC098613.1 | 0.836269506 | 8.41E-184 | postive |
| LY86   | AC110995.1 | 0.708695611 | 1.55E-107 | postive |
| LY86   | AC138207.5 | 0.791355476 | 6.96E-151 | postive |
| LY86   | AL161785.1 | 0.752402091 | 2.58E-128 | postive |
| LY86   | LINC01150  | 0.860596462 | 3.91E-206 | postive |
| LY86   | PCED1B-AS1 | 0.883227    | 4.32E-231 | postive |
| LYN    | AC008760.2 | 0.700123093 | 6.58E-104 | postive |
| LYN    | AC090559.1 | 0.724495268 | 1.39E-114 | postive |
| LYN    | AC098613.1 | 0.783784449 | 3.92E-146 | postive |
| LYN    | AC145098.1 | 0.758488013 | 1.48E-131 | postive |
| LYN    | LINC01150  | 0.806546288 | 4.85E-161 | postive |
| LYN    | PCED1B-AS1 | 0.785575315 | 3.07E-147 | postive |
| MAL    | AC009063.2 | 0.801606509 | 1.22E-157 | postive |
| MAL    | AC016597.1 | 0.860816604 | 2.35E-206 | postive |
| MAL    | AC018647.1 | 0.759332963 | 5.17E-132 | postive |
| MAL    | AL023284.4 | 0.782931419 | 1.31E-145 | postive |
| MAL    | AL138881.1 | 0.706610253 | 1.21E-106 | postive |
| MAL    | AL358216.1 | 0.701473353 | 1.80E-104 | postive |
| MAL    | HPN-AS1    | 0.81367092  | 4.03E-166 | postive |
| MAL    | NTM-AS1    | 0.805372315 | 3.18E-160 | postive |
| MBP    | AC009063.2 | 0.847215342 | 2.29E-193 | postive |
| MBP    | AC016597.1 | 0.882463691 | 3.63E-230 | postive |

---

---

|         |             |             |           |         |
|---------|-------------|-------------|-----------|---------|
| MBP     | AC018647.1  | 0.802249256 | 4.45E-158 | postive |
| MBP     | AL023284.4  | 0.766623553 | 4.85E-136 | postive |
| MBP     | AL138881.1  | 0.725727371 | 3.74E-115 | postive |
| MBP     | AL358216.1  | 0.706991948 | 8.34E-107 | postive |
| MBP     | HPN-AS1     | 0.779796342 | 1.05E-143 | postive |
| MBP     | LINC00320   | 0.732754697 | 1.82E-118 | postive |
| MBP     | NTM-AS1     | 0.783234334 | 8.54E-146 | postive |
| MLF1    | ERICH6-AS1  | 0.782772676 | 1.64E-145 | postive |
| MLF1    | NRAV        | 0.760352272 | 1.44E-132 | postive |
| NCF4    | AC098613.1  | 0.736153066 | 4.17E-120 | postive |
| NCF4    | AC110995.1  | 0.750644166 | 2.14E-127 | postive |
| NCF4    | AC138207.4  | 0.705921495 | 2.39E-106 | postive |
| NCF4    | AC138207.5  | 0.838305709 | 1.58E-185 | postive |
| NCF4    | AC145098.1  | 0.722023605 | 1.90E-113 | postive |
| NCF4    | AL161785.1  | 0.743958746 | 5.69E-124 | postive |
| NCF4    | LINC01150   | 0.810030347 | 1.69E-163 | postive |
| NCF4    | PCED1B-AS1  | 0.882063393 | 1.10E-229 | postive |
| NCOA6   | AC005288.1  | 0.742073983 | 5.02E-123 | postive |
| NFAM1   | AC145098.1  | 0.794483341 | 6.63E-153 | postive |
| POU2F2  | AC090559.1  | 0.715961392 | 1.02E-110 | postive |
| PRELID1 | AL445524.1  | 0.71602412  | 9.57E-111 | postive |
| PRELID1 | MIR4435-2HG | 0.70276055  | 5.19E-105 | postive |
| PSMB10  | PCED1B-AS1  | 0.71614032  | 8.50E-111 | postive |
| PSMB10  | PSMB8-AS1   | 0.704799669 | 7.16E-106 | postive |
| PTAFR   | AC002091.1  | 0.708947287 | 1.20E-107 | postive |
| PTAFR   | AC090559.1  | 0.799515064 | 3.13E-156 | postive |
| PTAFR   | AC098613.1  | 0.748631065 | 2.36E-126 | postive |
| PTAFR   | AC110995.1  | 0.742805646 | 2.16E-123 | postive |
| PTAFR   | AL161785.1  | 0.792251077 | 1.85E-151 | postive |
| PTAFR   | LINC01150   | 0.774954122 | 7.91E-141 | postive |
| PTPRC   | AC090559.1  | 0.823193107 | 2.91E-173 | postive |
| PTPRC   | AC145098.1  | 0.744487559 | 3.08E-124 | postive |
| PTPRC   | LINC01150   | 0.713092871 | 1.89E-109 | postive |
| RASGRP4 | AC002091.1  | 0.774984606 | 7.59E-141 | postive |
| RASGRP4 | AC090559.1  | 0.821304026 | 8.22E-172 | postive |
| RASGRP4 | AC110995.1  | 0.756871475 | 1.10E-130 | postive |
| RASGRP4 | AC138207.5  | 0.738924034 | 1.84E-121 | postive |
| RASGRP4 | AC145098.1  | 0.72820771  | 2.60E-116 | postive |
| RASGRP4 | AL133371.2  | 0.760550138 | 1.13E-132 | postive |
| RASGRP4 | AL161785.1  | 0.848240435 | 2.67E-194 | postive |
| RASGRP4 | LINC01150   | 0.789489908 | 1.08E-149 | postive |
| RASGRP4 | PCED1B-AS1  | 0.73753323  | 8.85E-121 | postive |
| SART1   | AC010536.3  | 0.71279331  | 2.56E-109 | postive |
| SART1   | AP001505.1  | 0.705378682 | 4.06E-106 | postive |

---

---

|         |                           |             |           |         |
|---------|---------------------------|-------------|-----------|---------|
| SCIN    | AC008760.2                | 0.744285837 | 3.89E-124 | postive |
| SCIN    | AC090559.1                | 0.771495623 | 8.14E-139 | postive |
| SCIN    | LINC01150                 | 0.737517544 | 9.00E-121 | postive |
| SCIN    | PCED1B-AS1                | 0.714843507 | 3.20E-110 | postive |
| SEMA4D  | AC016597.1                | 0.797304085 | 9.31E-155 | postive |
| SEMA4D  | AC018647.1                | 0.839590017 | 1.26E-186 | postive |
| SEMA4D  | NTM-AS1                   | 0.71634534  | 6.89E-111 | postive |
| SPI1    | AC002091.1                | 0.723382275 | 4.52E-114 | postive |
| SPI1    | AC008760.2                | 0.714509428 | 4.49E-110 | postive |
| SPI1    | AC090559.1                | 0.702891985 | 4.57E-105 | postive |
| SPI1    | AC098613.1                | 0.744191731 | 4.34E-124 | postive |
| SPI1    | AC110995.1                | 0.720040526 | 1.51E-112 | postive |
| SPI1    | AC138207.5                | 0.809394003 | 4.80E-163 | postive |
| SPI1    | AC145098.1                | 0.773264543 | 7.69E-140 | postive |
| SPI1    | AL161785.1                | 0.779886976 | 9.23E-144 | postive |
| SPI1    | LINC01150                 | 0.827658214 | 9.24E-177 | postive |
| SPI1    | PCED1B-AS1                | 0.840984904 | 7.82E-188 | postive |
| ST6GAL1 | AC090559.1                | 0.736767773 | 2.09E-120 | postive |
| ST6GAL1 | AC093627.7                | 0.735389525 | 9.79E-120 | postive |
| SYK     | AC002091.1                | 0.778652083 | 5.09E-143 | postive |
| SYK     | AC090559.1                | 0.884962739 | 3.24E-233 | postive |
| SYK     | AC093627.7                | 0.726065816 | 2.60E-115 | postive |
| SYK     | AC098613.1                | 0.7296192   | 5.64E-117 | postive |
| SYK     | AC110995.1                | 0.767861981 | 9.69E-137 | postive |
| SYK     | AC138207.5                | 0.714772661 | 3.44E-110 | postive |
| SYK     | AC145098.1                | 0.708513883 | 1.85E-107 | postive |
| SYK     | AL133371.2                | 0.766052587 | 1.01E-135 | postive |
| SYK     | AL161785.1                | 0.842291639 | 5.66E-189 | postive |
| SYK     | LINC01150                 | 0.809938868 | 1.97E-163 | postive |
| SYK     | PCED1B-AS1                | 0.77059968  | 2.67E-138 | postive |
| TAZ     | AC004148.2                | 0.763191334 | 3.98E-134 | postive |
| TAZ     | AC005785.1                | 0.783282204 | 7.98E-146 | postive |
| TAZ     | AC009065.8                | 0.769062228 | 2.02E-137 | postive |
| TAZ     | AC009283.1                | 0.735520523 | 8.46E-120 | postive |
| TAZ     | AC016773.1                | 0.757673338 | 4.08E-131 | postive |
| TAZ     | AC069281.2                | 0.768481309 | 4.32E-137 | postive |
| TAZ     | AC092119.2                | 0.717915589 | 1.37E-111 | postive |
| TAZ     | AC092171.4                | 0.726238319 | 2.17E-115 | postive |
| TAZ     | AC126118.1                | 0.727369081 | 6.43E-116 | postive |
| TAZ     | AL022328.2                | 0.705335309 | 4.24E-106 | postive |
| TAZ     | AL109811.3                | 0.74287881  | 1.99E-123 | postive |
| TAZ     | AL117379.1                | 0.728861938 | 1.28E-116 | postive |
| TAZ     | ARHGAP27P1-BPTFP1-KPNA2P3 | 0.716357414 | 6.80E-111 | postive |
| TAZ     | ASMTL-AS1                 | 0.748106922 | 4.39E-126 | postive |

---

---

|        |              |             |           |         |
|--------|--------------|-------------|-----------|---------|
| TAZ    | MHENCN       | 0.702020554 | 1.06E-104 | postive |
| TAZ    | SLC25A25-AS1 | 0.712608039 | 3.08E-109 | postive |
| TCF12  | AC009227.1   | 0.72668548  | 1.34E-115 | postive |
| TGFB2  | TGFB2-AS1    | 0.947344465 | 0         | postive |
| TLR7   | AC090559.1   | 0.85923014  | 9.03E-205 | postive |
| TLR7   | AC110995.1   | 0.751822815 | 5.20E-128 | postive |
| TLR7   | AF127936.1   | 0.705512389 | 3.57E-106 | postive |
| TLR7   | AL161785.1   | 0.75886111  | 9.32E-132 | postive |
| TLR7   | LINC01150    | 0.732161769 | 3.50E-118 | postive |
| TLR8   | AC145098.1   | 0.744647676 | 2.55E-124 | postive |
| TREM2  | AC098613.1   | 0.718134712 | 1.09E-111 | postive |
| TREM2  | AC138207.5   | 0.706042588 | 2.12E-106 | postive |
| TREM2  | AL161785.1   | 0.713572553 | 1.16E-109 | postive |
| TREM2  | LINC01150    | 0.778833097 | 3.97E-143 | postive |
| TREM2  | PCED1B-AS1   | 0.786317308 | 1.06E-147 | postive |
| VIPR1  | AC004816.1   | 0.759169346 | 6.35E-132 | postive |
| VIPR1  | AC008780.2   | 0.820797545 | 2.00E-171 | postive |
| VIPR1  | AC015468.3   | 0.753001311 | 1.25E-128 | postive |
| VIPR1  | AC015967.1   | 0.770097546 | 5.17E-138 | postive |
| VIPR1  | AC061961.1   | 0.783443168 | 6.36E-146 | postive |
| VIPR1  | AC104072.1   | 0.802831048 | 1.79E-158 | postive |
| VIPR1  | AC110491.1   | 0.737259845 | 1.20E-120 | postive |
| VIPR1  | AC125616.1   | 0.791732665 | 3.99E-151 | postive |
| VIPR1  | AC138649.1   | 0.765946759 | 1.16E-135 | postive |
| VIPR1  | AL021395.1   | 0.855121839 | 9.35E-201 | postive |
| VIPR1  | AL356479.1   | 0.700922517 | 3.06E-104 | postive |
| VIPR1  | AP003355.2   | 0.874750995 | 3.53E-221 | postive |
| VIPR1  | ATP2B1-AS1   | 0.745021282 | 1.65E-124 | postive |
| VIPR1  | DLGAP1-AS4   | 0.859761324 | 2.67E-205 | postive |
| VIPR1  | LINC00507    | 0.795138677 | 2.48E-153 | postive |
| VIPR1  | MIR600HG     | 0.764802499 | 5.07E-135 | postive |
| VIPR1  | PART1        | 0.862762667 | 2.51E-208 | postive |
| VIPR1  | RFPL1S       | 0.81671186  | 2.35E-168 | postive |
| VIPR1  | SLC26A4-AS1  | 0.853065327 | 8.60E-199 | postive |
| VTN    | AP006623.1   | 0.716105036 | 8.81E-111 | postive |
| VTN    | ZNF213-AS1   | 0.711646395 | 8.12E-109 | postive |
| WAS    | AC090559.1   | 0.729047537 | 1.05E-116 | postive |
| WAS    | AC098613.1   | 0.723411618 | 4.39E-114 | postive |
| WAS    | AC138207.5   | 0.759877349 | 2.62E-132 | postive |
| WAS    | AC145098.1   | 0.722609047 | 1.02E-113 | postive |
| WAS    | AL161785.1   | 0.77868767  | 4.85E-143 | postive |
| WAS    | LINC01150    | 0.79015628  | 4.06E-150 | postive |
| WAS    | PCED1B-AS1   | 0.791766991 | 3.79E-151 | postive |
| ZNF675 | AC011477.3   | 0.770324863 | 3.83E-138 | postive |

---



**Supplementary table 2** Univariate COX analysis identified immune related lncRNAs

| ID         | Hazard ratio (HR) | HR.95L   | HR.95H   | pvalue   |
|------------|-------------------|----------|----------|----------|
| CYTOR      | 2.272647          | 2.04999  | 2.519487 | 6.74E-55 |
| TGFB2-AS1  | 1.586601          | 1.43489  | 1.754351 | 2.22E-19 |
| TMPO-AS1   | 2.182833          | 1.612303 | 2.95525  | 4.41E-07 |
| AC090559.1 | 1.481147          | 1.232905 | 1.779372 | 2.71E-05 |
| AC008760.2 | 1.913823          | 1.679449 | 2.180904 | 2.06E-22 |
| AC018647.1 | 0.525794          | 0.432296 | 0.639514 | 1.24E-10 |
| LINC01150  | 2.108918          | 1.729539 | 2.571515 | 1.65E-13 |
| ERICH6-AS1 | 1.963907          | 1.638012 | 2.354642 | 3.09E-13 |
| AL021395.1 | 0.44512           | 0.319661 | 0.619818 | 1.65E-06 |
| AC138207.4 | 3.608729          | 2.729836 | 4.770588 | 2.03E-19 |
| AL022328.2 | 0.503879          | 0.395868 | 0.641361 | 2.57E-08 |
| PAXBP1-AS1 | 0.150753          | 0.104745 | 0.216969 | 2.31E-24 |
| AC145098.1 | 3.471031          | 2.790766 | 4.317113 | 5.02E-29 |
| AL161785.1 | 1.429925          | 1.183244 | 1.728034 | 0.000214 |
| AL355297.4 | 0.455504          | 0.329286 | 0.630102 | 2.04E-06 |
| AC009227.1 | 0.149051          | 0.108052 | 0.205608 | 4.24E-31 |
| AC108449.2 | 0.586626          | 0.490135 | 0.702112 | 5.98E-09 |
| AL023284.4 | 0.677317          | 0.577876 | 0.79387  | 1.51E-06 |
| AP006623.1 | 0.315043          | 0.21047  | 0.471573 | 2.00E-08 |
| CARD8-AS1  | 3.414321          | 2.803478 | 4.158258 | 2.75E-34 |
| PSMB8-AS1  | 2.50268           | 2.096438 | 2.987641 | 3.27E-24 |
| AC018755.4 | 1.476234          | 1.239305 | 1.758458 | 1.28E-05 |
| NRAV       | 3.392108          | 2.798168 | 4.112117 | 1.64E-35 |
| PART1      | 0.628179          | 0.477248 | 0.826844 | 0.000913 |
| ZIM2-AS1   | 2.040535          | 1.63514  | 2.546436 | 2.77E-10 |
| LINC00339  | 3.511252          | 2.793495 | 4.413428 | 5.05E-27 |
| AC004148.2 | 0.681164          | 0.557478 | 0.832293 | 0.000173 |
| AC010536.3 | 0.12729           | 0.085712 | 0.189039 | 1.69E-24 |
| PCED1B-AS1 | 2.007918          | 1.707411 | 2.361313 | 3.53E-17 |
| AP001505.1 | 0.479898          | 0.391684 | 0.587979 | 1.40E-12 |
| AC010834.3 | 0.307982          | 0.225677 | 0.420305 | 1.14E-13 |
| AC012073.1 | 3.289475          | 2.602098 | 4.158432 | 2.37E-23 |
| AC015967.1 | 0.130933          | 0.085279 | 0.20103  | 1.49E-20 |
| AC138649.1 | 0.637297          | 0.508291 | 0.799045 | 9.46E-05 |
| AC073611.1 | 3.473073          | 2.799318 | 4.30899  | 1.11E-29 |
| AC126118.1 | 0.409833          | 0.292857 | 0.573533 | 1.97E-07 |
| LINC00900  | 5.890004          | 4.471243 | 7.75895  | 1.83E-36 |
| AC110491.1 | 0.449834          | 0.333405 | 0.606921 | 1.72E-07 |
| AC092171.4 | 0.650166          | 0.507309 | 0.83325  | 0.000671 |
| AL445524.1 | 4.578718          | 3.66869  | 5.714481 | 2.79E-41 |
| ZBTB20-AS4 | 0.143213          | 0.098213 | 0.208833 | 5.63E-24 |
| AC068152.1 | 0.45629           | 0.310589 | 0.670342 | 6.39E-05 |

---

|              |          |          |          |          |
|--------------|----------|----------|----------|----------|
| AL355922.1   | 1.83687  | 1.594133 | 2.116568 | 4.15E-17 |
| ZNF213-AS1   | 0.399205 | 0.296915 | 0.536735 | 1.20E-09 |
| AC011477.3   | 0.474073 | 0.369369 | 0.608457 | 4.58E-09 |
| AC092119.2   | 0.548599 | 0.385707 | 0.780283 | 0.000837 |
| SLC6A1-AS1   | 0.258098 | 0.188915 | 0.352617 | 1.78E-17 |
| AF106564.1   | 0.269595 | 0.195144 | 0.37245  | 1.87E-15 |
| AP003355.2   | 0.648685 | 0.510361 | 0.824501 | 0.000405 |
| AC138207.5   | 1.712105 | 1.435159 | 2.042492 | 2.33E-09 |
| AC061961.1   | 0.46065  | 0.345685 | 0.613849 | 1.21E-07 |
| LINC00320    | 0.552108 | 0.476939 | 0.639125 | 1.79E-15 |
| MIR600HG     | 0.362379 | 0.279533 | 0.469779 | 1.79E-14 |
| RFPL1S       | 0.568468 | 0.473713 | 0.682177 | 1.27E-09 |
| MIR4435-2HG  | 2.344239 | 2.081627 | 2.639981 | 7.24E-45 |
| SLC25A25-AS1 | 0.571207 | 0.427503 | 0.763216 | 0.000152 |
| AC098613.1   | 2.063407 | 1.724142 | 2.469431 | 2.71E-15 |
| AC125616.1   | 0.272939 | 0.181533 | 0.41037  | 4.36E-10 |
| AC009283.1   | 0.493242 | 0.385917 | 0.630415 | 1.65E-08 |
| AL133371.2   | 1.813064 | 1.442225 | 2.279257 | 3.46E-07 |
| AC002091.1   | 2.546407 | 1.878572 | 3.451658 | 1.71E-09 |
| AL157392.3   | 0.088843 | 0.062626 | 0.126035 | 6.14E-42 |
| AC147651.3   | 2.769052 | 2.391742 | 3.205885 | 2.74E-42 |

---
